# Supplementary material for: Rhodamine based dual probes for selective detection of mercury and fluoride ions in water using two mutually independent sensing pathways
Source: Royal Society of Chemistry journal article supplement (doi:10.1039/c3an02020g), 2014-01-01
Supplement: c3an02020g.pdf [file c3an02020g.pdf]

# Rhodamine based Dual Probes for Selective Detection of Mercury and Fluoride Ions in Water using Two Mutually Independent Sensing Pathways

Namita Kumari,<sup>a</sup> Nilanjan Dey<sup>a</sup> and Santanu Bhattacharya\*<sup>a, b</sup>

<sup>a</sup>Department of Organic Chemistry, Indian Institute of Science, Bangalore 560 012, and <sup>b</sup>Chemical Biology Unit, JNCASR, Bangalore 560 064, India.

## Contents

|     |                                                                                                                        |        |
|-----|------------------------------------------------------------------------------------------------------------------------|--------|
| 1.  | Synthetic procedure of starting materials                                                                              | S2-3   |
| 2.  | UV-vis titration of <b>1</b> and <b>2</b> with fluoride ion                                                            | S4     |
| 3.  | Interference checking for fluoride ion detection                                                                       | S4     |
| 4.  | Fluorescence titrations of <b>1</b> and <b>2</b> with TBAF in acetonitrile                                             | S5     |
| 5.  | Stoichiometry determination of <b>1</b> and <b>2</b> with F <sup>-</sup> ion in CH <sub>3</sub> CN                     | S5     |
| 6.  | Fluorescence titration of <b>1</b> and <b>2</b> with TBAF in various mixtures of DMF-water                             | S6     |
| 7.  | Fluorescence titration of <b>1</b> and <b>2</b> with KF in various mixtures of DMF-water medium                        | S7     |
| 8.  | UV-vis titration of <b>1</b> and <b>2</b> with Hg <sup>2+</sup> ion in CH <sub>3</sub> CN                              | S8     |
| 9.  | Interference checking for mercury ion detection                                                                        | S8     |
| 10. | Normalized absorption spectra <b>1</b> with added Hg <sup>2+</sup> ions and upon addition of various ions/molecules    | S9     |
| 11. | Stoichiometry determination of <b>1</b> and <b>2</b> with Hg <sup>2+</sup> ion in CH <sub>3</sub> CN                   | S9     |
| 12. | Fluorescence titrations of <b>1</b> and <b>2</b> with Hg <sup>2+</sup> in acetonitrile                                 | S9     |
| 13. | Fluorescence spectra of <b>1</b> and <b>2</b> in 3:2 HEPES (pH 7.4)-CH <sub>3</sub> CN mixture                         | S10    |
| 14. | Fluorescence titration of <b>1</b> and <b>2</b> with Hg <sup>2+</sup> in 3:2 HEPES (pH 7.4)-CH <sub>3</sub> CN mixture | S11    |
| 15. | Recovery of molecular fluorescence of <b>1</b> and <b>2</b> after adding EDTA                                          | S11    |
| 16. | Binding constant of <b>1</b> and <b>2</b> with Hg <sup>2+</sup> and F <sup>-</sup> ion in different media              | S12    |
| 17. | UV-vis spectra of <b>1</b> with added F <sup>-</sup> ions and titrated with Hg <sup>2+</sup> ions and vice-versa       | S13    |
| 18. | Reversibility study for both <b>1</b> and <b>2</b> complex of F <sup>-</sup> upon addition of Ca <sup>2+</sup> ions    | S14    |
| 19. | <sup>1</sup> H NMR titration of <b>1</b> with F <sup>-</sup>                                                           | S14    |
| 20. | Mass spectra of <b>1</b> and <b>2</b> after addition of F <sup>-</sup> ion                                             | S15    |
| 21. | <sup>1</sup> H NMR titration of <b>1</b> with Hg <sup>2+</sup>                                                         | S16    |
| 22. | IR spectra of <b>1</b> and <b>1</b> -Hg <sup>2+</sup> complex                                                          | S17    |
| 23. | Detection Hg(II) in real life water samples using <b>1</b> and <b>2</b>                                                | S17    |
| 24. | Scans of <sup>1</sup> H and <sup>13</sup> C-NMR spectra of <b>1</b> and <b>2</b>                                       | S18-19 |

### Synthesis of starting material:

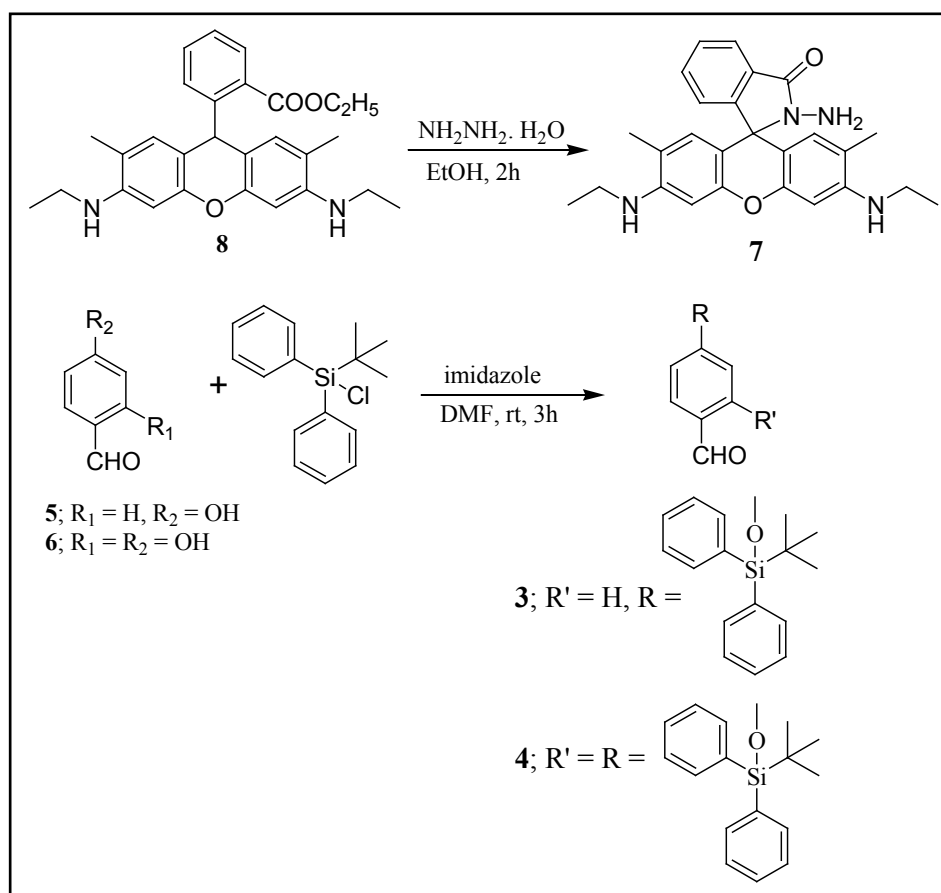

**Scheme S1.** Synthetic procedure of starting materials.

**Synthesis of rhodamine hydrozone (7).** Rhodamine-6G hydrozone (7) was prepared according to a procedure described in literature.<sup>1</sup> In a 50 mL round bottomed flask, Rhodamine-6G (0.48 g, 1 mmol) was dissolved in 15 mL ethanol. To that 1.5 mL (excess) hydrazine monohydrate (85%) was added dropwise with vigorous stirring at room temperature. After the addition, the stirred mixture was refluxed for 2h, and then cooled overnight. The resulting precipitate was filtered and washed 3 times with 10 mL EtOH/water. After drying under vacuum, the reaction afforded Rhodamine-6G hydrozone. Yield 0.37 g, 80 %; IR (neat,  $\text{cm}^{-1}$ ) 3370.6, 2921.5, 1621.4, 1516.6, 1270.3, 1203.6, 1017.8, 742.4;  $^1\text{H}$  NMR (400 MHz,  $\text{CDCl}_3$ )  $\delta$  (ppm): 1.32 (t,  $J = 7.1$  Hz, 6H), 1.92 (s, 6H), 3.22 (q,  $J = 6.9$  Hz, 4H), 3.56 (br, 4H), 6.26 (s, 2H), 6.39 (s, 2H), 7.06 (t,  $J = 3.3$  Hz, 1H), 7.45 (t,  $J = 4.6$  Hz, 2H), 7.96 (t,  $J = 3.2$  Hz, 1H); HRMS  $m/z$  calcd. for  $\text{C}_{26}\text{H}_{28}\text{N}_4\text{O}_2$  ( $\text{M}+\text{Na}$ )<sup>+</sup> 451.2110, found 451.2106.

**Synthesis of 4-(tert-Butyldiphenylsilyloxy)benzaldehyde (3).**<sup>2</sup> 4-hydroxybenzaldehyde (0.5 g, 4.1 mmol), imidazole (0.42 g, 6.1 mmol) and *tert*-butyldiphenylsilyl chloride (1.28 mL, 4.6 mmol) were taken in DMF and stirred at rt for 3 h. After that the reaction mixture was diluted with brine and the aqueous layer was extracted with ether. The combined organic extracts were washed with water, dried (using anhydrous Na<sub>2</sub>SO<sub>4</sub>) and concentrated to get an oily residue, which was further purified by silica gel column chromatography (5% EtOAc/hexane) to get the silyl ether as white crystals. Yield 1.41 g, 96%; IR (neat, cm<sup>-1</sup>) 3433.6, 2859.4, 2859.4, 1701.9, 1599, 1508.2, 1274.1, 1115.1, 911.2, 701.2; <sup>1</sup>H NMR (400 MHz, CDCl<sub>3</sub>) δ (ppm): 1.11 (s, 9H), 6.86 (d, *J* = 8.4 Hz, 2H), 7.39 (d, *J* = 7.2 Hz, 4H), 7.44 (d, *J* = 7.2 Hz, 4H), 7.64 (d, *J* = 8.4 Hz, 2H), 7.70 (d, *J* = 7.2 Hz, 2H), 9.80 (s, 1H); HRMS *m/z* calcd for C<sub>23</sub>H<sub>24</sub>O<sub>2</sub>Si (M+Na)<sup>+</sup> 383.1443, found 383.1443.

**Synthesis of 2, 4-(tert-Butyldiphenylsilyloxy)benzaldehyde (4).** 2, 4-hydroxybenzaldehyde (0.25 g, 1.8 mmol), imidazole (0.42 g, 6.1 mmol) and *tert*-butyldiphenylsilyl chloride (1.3 mL, 4.7 mmol) were taken in DMF and stirred at rt for 3 h. After that the reaction mixture was diluted with brine and the aqueous layer was extracted with ether. The combined organic extracts were washed with water, dried (using anhydrous Na<sub>2</sub>SO<sub>4</sub>) and concentrated to get an oily residue, which was further purified by silica gel column chromatography (5% EtOAc/hexane) to get the silyl ether as light yellow oily material. Yield 1.13 g, 90%; IR (neat, cm<sup>-1</sup>) 3450.2, 2959.3, 2859.4, 1686.0, 1594.6, 1428.2, 1112.9, 998.0, 822.5, 700.8; <sup>1</sup>H NMR (400 MHz, CDCl<sub>3</sub>) δ (ppm): 1.04 (s, 18H), 7.20 (s, 2H), 7.37 (t, *J* = 4.8 Hz, 3H), 7.42-7.39 (m, 12H), 7.50 (d, *J* = 7.6 Hz, 2H), 7.68 (t, *J* = 6.4 Hz, 4H), 10.5 (s, 1H); HRMS *m/z* calcd. for C<sub>39</sub>H<sub>42</sub>O<sub>3</sub>Si<sub>2</sub> (M+Na)<sup>+</sup> 637.2570, found 637.2571.

1. (a) Y.-K. Yang, K.-J. Yook and J. Tae, *J. Am. Chem. Soc.*, 2005, **127**, 16760. (b) X.-F. Yang, X.-Q. Guo and Y.-B. Zhao, *Talanta*, 2002, **57**, 883.
2. K. C. Lee, B. S. Moon, J. H. Lee, K.-H. Chung, J. A. Katzenellenbogen, D. Y. Chi, *Bioorg. Med. Chem.*, 2003, **11**, 3649.

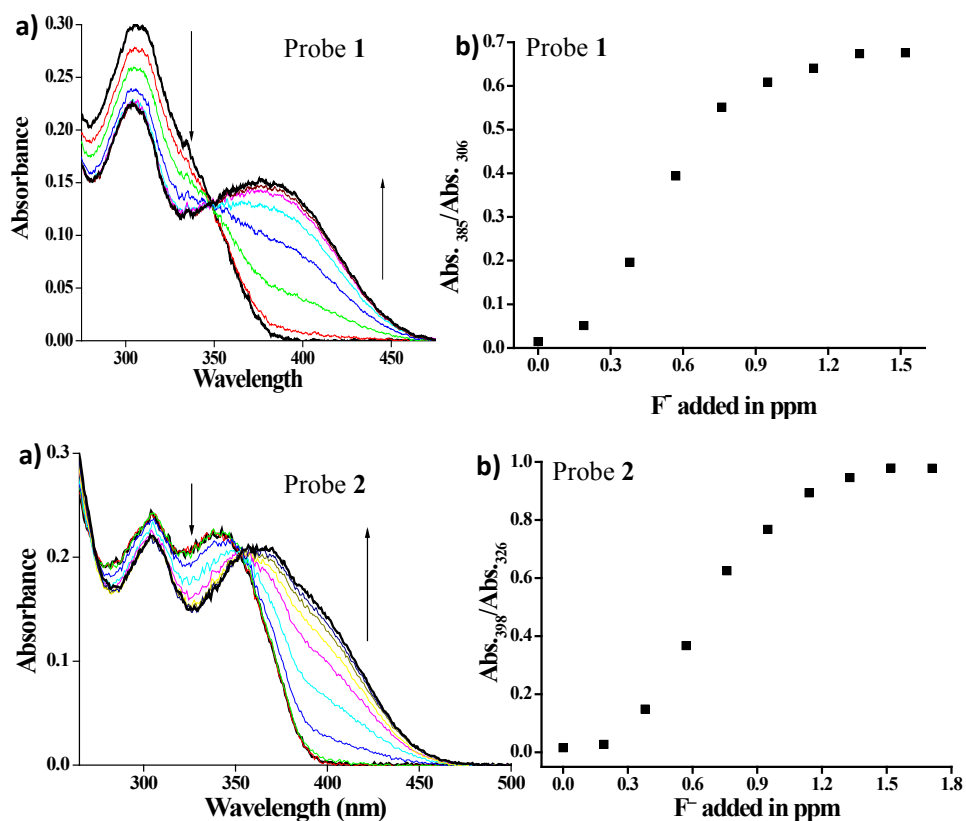

**Fig. S1** (a) UV-vis titration of probe (10  $\mu$ M) with fluoride ion (TBAF) in acetonitrile. (b) Plot of absorbance ratio with the added fluoride ion.

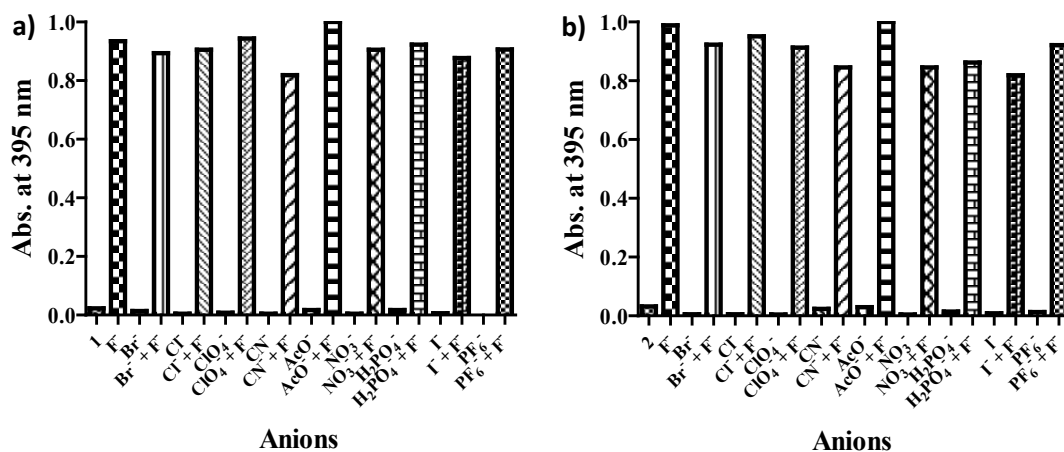

**Fig. S2** Normalized plot of (a) Absorbance at 395 nm for **1** (10  $\mu$ M) in  $CH_3CN$  upon addition of fluoride ion (TBAF) (20 equiv.) in presence of excess of other anions (50 equiv.). (b) Absorbance at 395 nm for **2** (10  $\mu$ M) in acetonitrile upon addition of fluoride ion (TBAF) (20 equiv.) in presence of excess of other anions (50 equiv.).

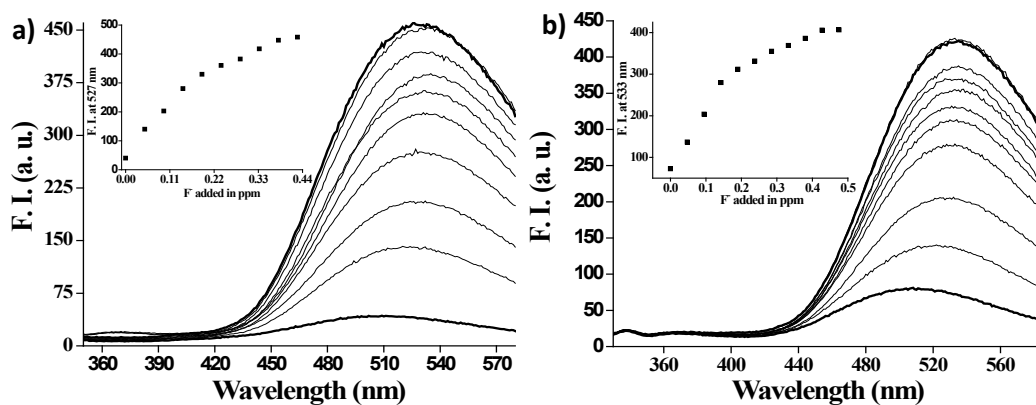

**Fig. S3** Fluorescence titrations of (a) **1** (5 μM) and (b) **2** (5 μM) with the F<sup>-</sup> ion in CH<sub>3</sub>CN. ( $\lambda_{\text{excit.}} = 305 \text{ nm}$ ) [Inset: plot of F. I. of the probe at (a) 527 nm and (b) 533 nm with the added F<sup>-</sup> ion.]

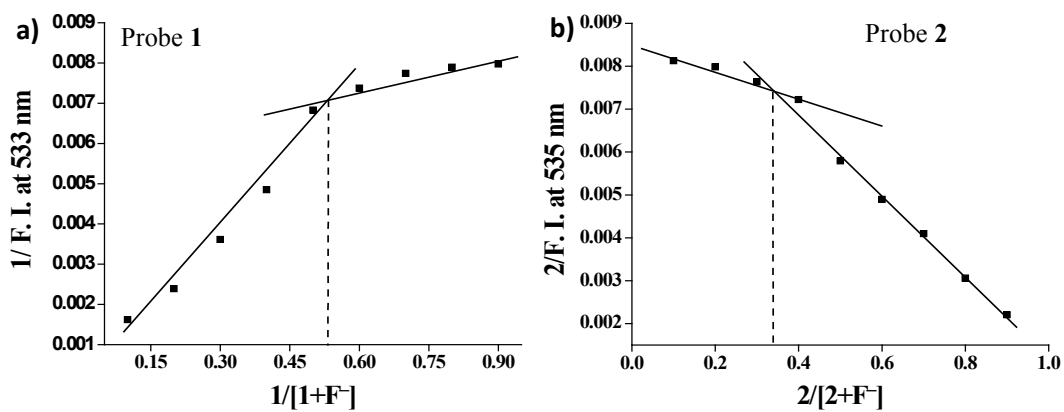

**Fig. S4** Stoichiometry determination of (a) **1** and (b) **2** with F<sup>-</sup> ion in CH<sub>3</sub>CN. [The total concentration [Probe] + [F<sup>-</sup>] =  $1.0 \times 10^{-4} \text{ M}$ .]

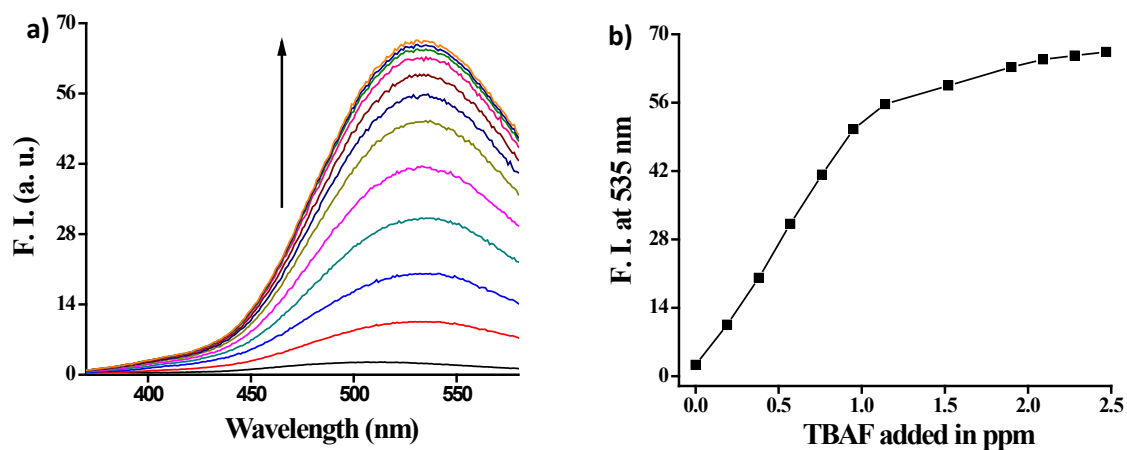

**Fig. S5** (a) Fluorescence titration of **1** (5 μM) with TBAF in 9:1 (DMF-water) ( $\lambda_{\text{ex.}} = 305$  nm); b) Plot of fluorescence emission intensity at 535 nm with the added  $\text{F}^-$  ion.

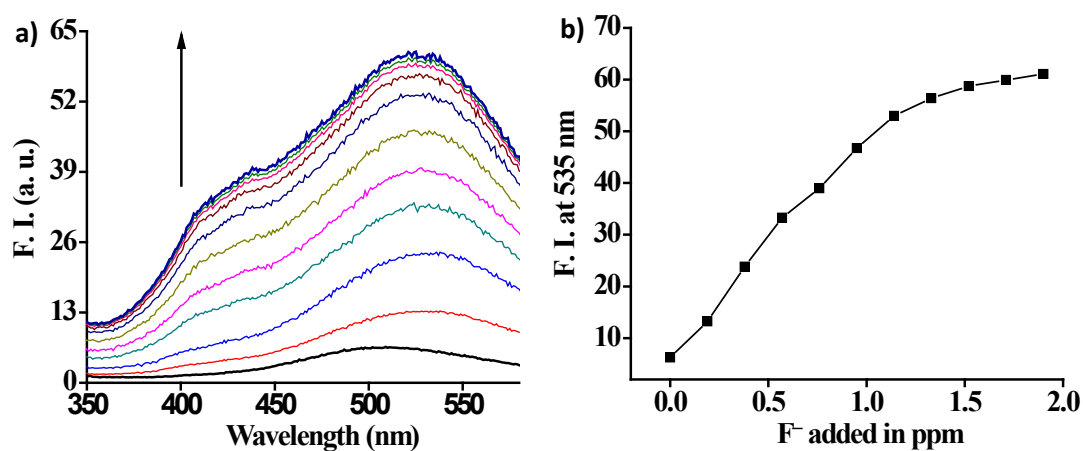

**Fig. S6** (a) Fluorescence titration of **2** (5 μM) in 8:2 (DMF-Water) at  $\lambda_{\text{ex.}} = 305$  nm. (b) Plot of fluorescence emission intensity at 535 nm with the added fluoride ion.

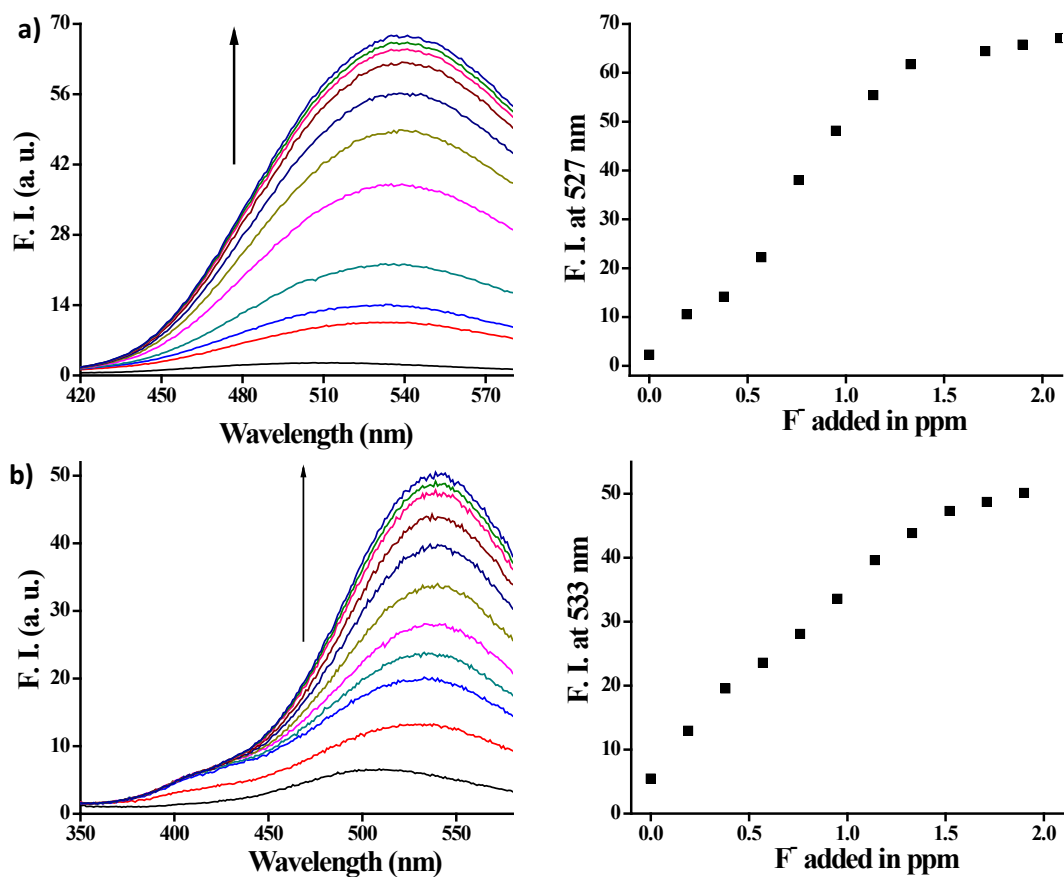

**Fig. S7** (a) Fluorescence titration of **1** (5  $\mu$ M) ( $\lambda_{\text{ex.}}$  = 305 nm) with KF (0-2 ppm) in 9:1 (DMF-Water). (b) Fluorescence titration of **2** (5  $\mu$ M) ( $\lambda_{\text{ex.}}$  = 305 nm) with KF (0-2 ppm) in 8:2 (DMF-water).

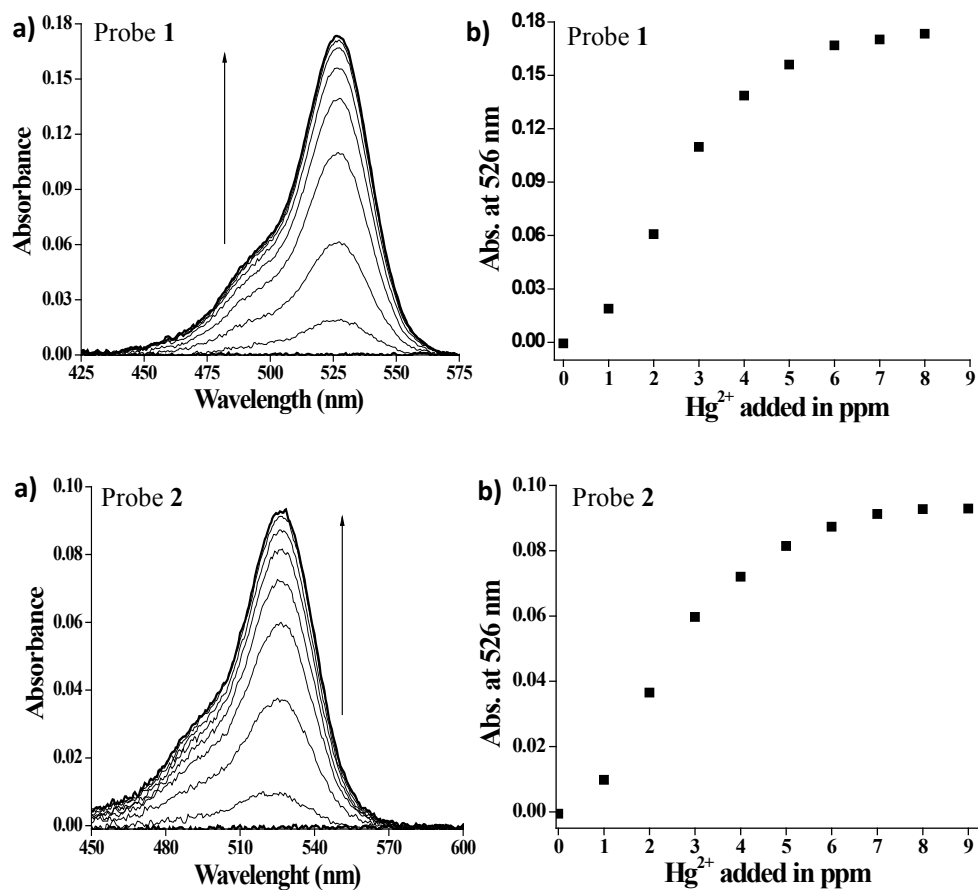

**Fig. S8** (a) UV-vis titration of probe (10  $\mu\text{M}$ ) with  $\text{Hg}^{2+}$  ion in  $\text{CH}_3\text{CN}$ . (b) Plot of the absorbance at 526 nm of probe with the added  $\text{Hg}^{2+}$  ion.

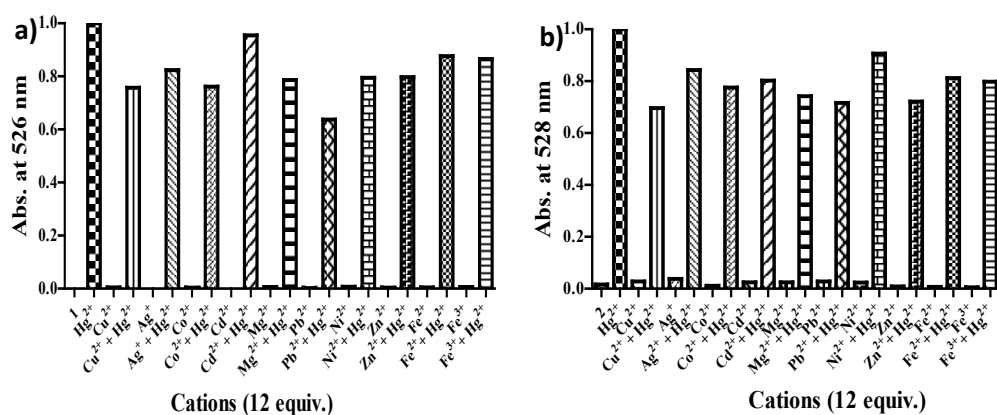

**Fig. S9** Normalized plot of the (a) absorbance at 526 nm for **1** (10  $\mu\text{M}$ ) in  $\text{CH}_3\text{CN}$  with  $\text{Hg}^{2+}$  (4 equiv.) and in presence of excess of other cations (12 equiv.). (b) Absorbance at 528 nm for **2** (10  $\mu\text{M}$ ) in  $\text{CH}_3\text{CN}$  with  $\text{Hg}^{2+}$  (4 equiv.) and in presence of an excess of other cations (12 equiv.).



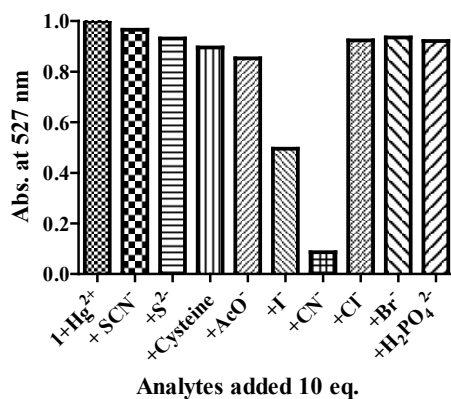

**Fig. S10** Normalized absorbance of **1** (10  $\mu$ M) at 527 nm with 5 equiv. of added Hg<sup>2+</sup> ions and to that 10 equiv of added ions/molecules.

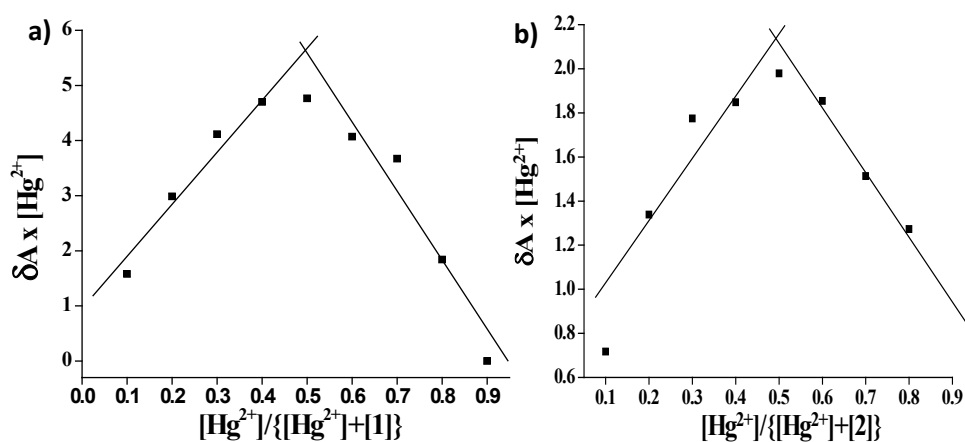

**Fig. S11** Job plot analyses of (a) **1** and (b) **2** with Hg<sup>2+</sup> ion in CH<sub>3</sub>CN. [( $\delta A$  = change in absorbance); the total concentration [probe] + [Hg<sup>2+</sup>] =  $1.0 \times 10^{-4}$  M.]

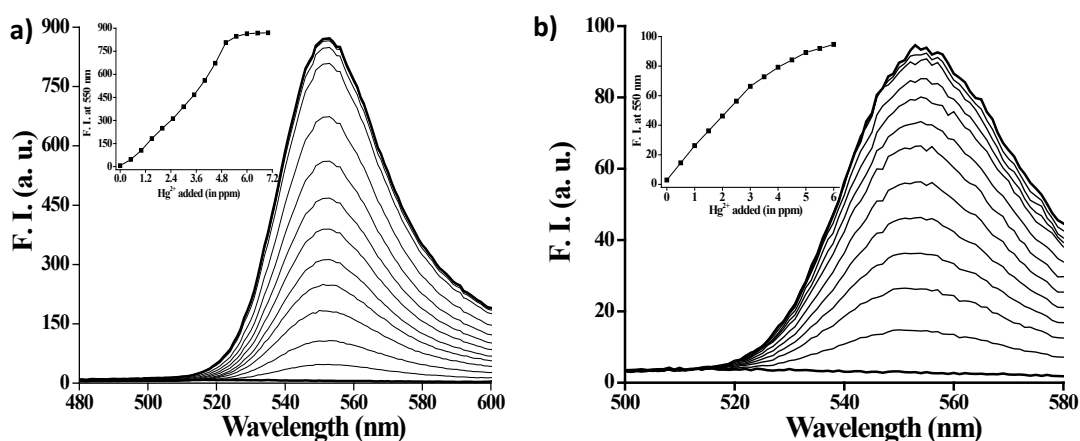

**Fig. S12** Fluorescence titration of (a) **1** (5  $\mu$ M) and (b) **2** (5  $\mu$ M) with Hg<sup>2+</sup> ion (0-2 equiv.) in CH<sub>3</sub>CN ( $\lambda_{ex}$  = 305 nm).

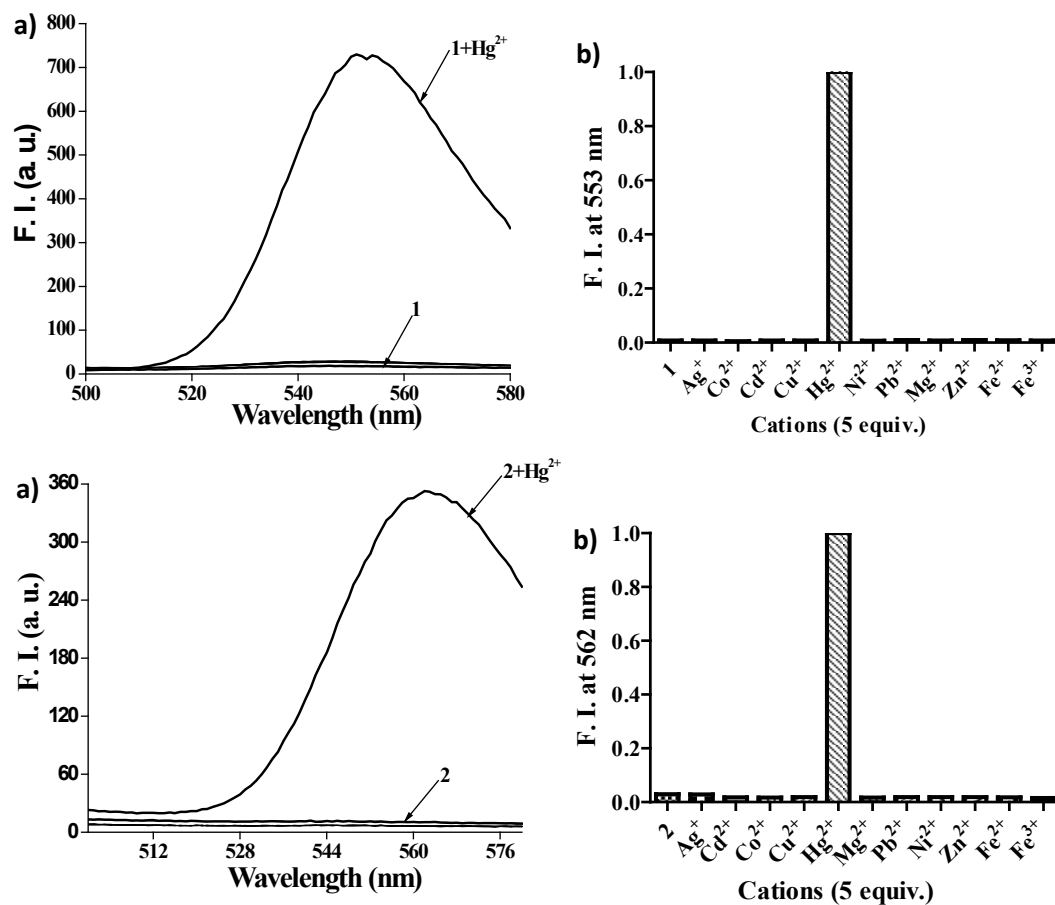

**Fig. S13** (a) Fluorescence spectra of probe (5 μM) in 3:2 HEPES (pH 7.4)-CH<sub>3</sub>CN mixture at  $\lambda_{\text{ex.}} = 305$  nm, upon addition of various cations (5 equiv.). (b) Normalized plot of the fluorescence intensity with different cations added.

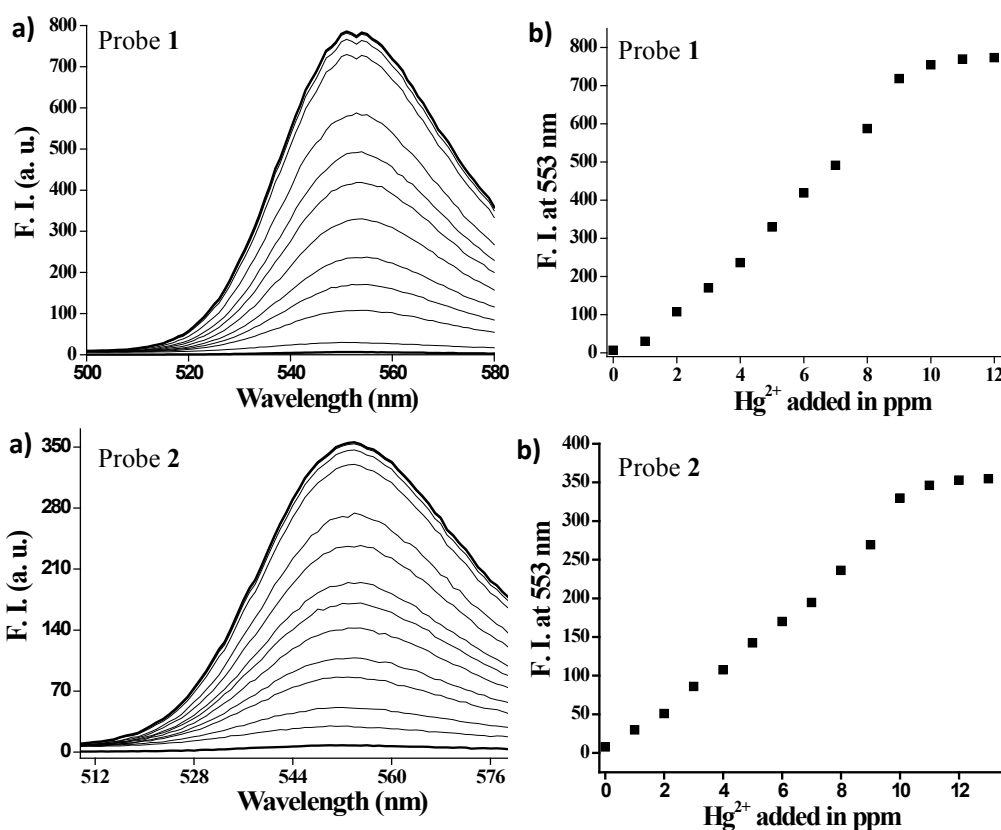

**Fig. S14** (a) Fluorescence titration of probe 1/2 (5  $\mu\text{M}$ ) with  $\text{Hg}^{2+}$  in 3:2 [buffer (pH 7.4)-acetonitrile mixture] ( $\lambda_{\text{ex.}} = 305 \text{ nm}$ ) (b) plot of F. I. at 553 nm with the added  $\text{Hg}^{2+}$  ions.

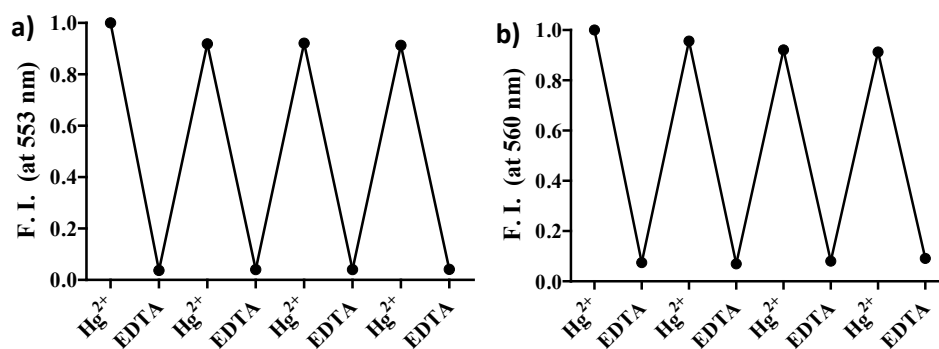

**Fig. S15** Recovery of molecular fluorescence of (a) 1 and (b) 2 after adding EDTA (10 equiv.) after each addition of 5 equiv. of  $\text{Hg}^{2+}$  to the probes (10  $\mu\text{M}$ ) in 6:4 (buffer-acetonitrile mixture).

**Table S1.** Binding constant of **1** with  $\text{Hg}^{2+}$  and  $\text{F}^-$  ion in different media according to Benesi-Hildebrand equation based on a 1:1 stoichiometry.

| Analyte          | Medium                                     | $\log K$        |
|------------------|--------------------------------------------|-----------------|
| $\text{Hg}^{2+}$ | Acetonitrile                               | $4.45 \pm 0.01$ |
| $\text{Hg}^{2+}$ | (2:3) $\text{CH}_3\text{CN}$ -HEPES buffer | $4.17 \pm 0.01$ |
| TBAF             | Acetonitrile                               | $4.89 \pm 0.02$ |
| TBAF             | (9:1) DMF-HEPES buffer                     | $2.54 \pm 0.02$ |
| KF               | (9:1) DMF-HEPES buffer                     | $2.71 \pm 0.01$ |

**Table S2.** Binding constant of **2** with  $\text{Hg}^{2+}$  for 1:1 stoichiometry and  $\text{F}^-$  ion for 1:2 stoichiometry in different medium according to Benesi-Hildebrand equation.

| Analyte          | Medium                                     | $\log K$         |
|------------------|--------------------------------------------|------------------|
| $\text{Hg}^{2+}$ | Acetonitrile                               | $4.87 \pm 0.01$  |
| $\text{Hg}^{2+}$ | (2:3) $\text{CH}_3\text{CN}$ -HEPES buffer | $4.69 \pm 0.01$  |
| TBAF             | Acetonitrile                               | $10.25 \pm 0.02$ |
| TBAF             | (8:2) DMF-HEPES buffer                     | $9.32 \pm 0.04$  |
| KF               | (8:2) DMF-HEPES buffer                     | $8.60 \pm 0.05$  |

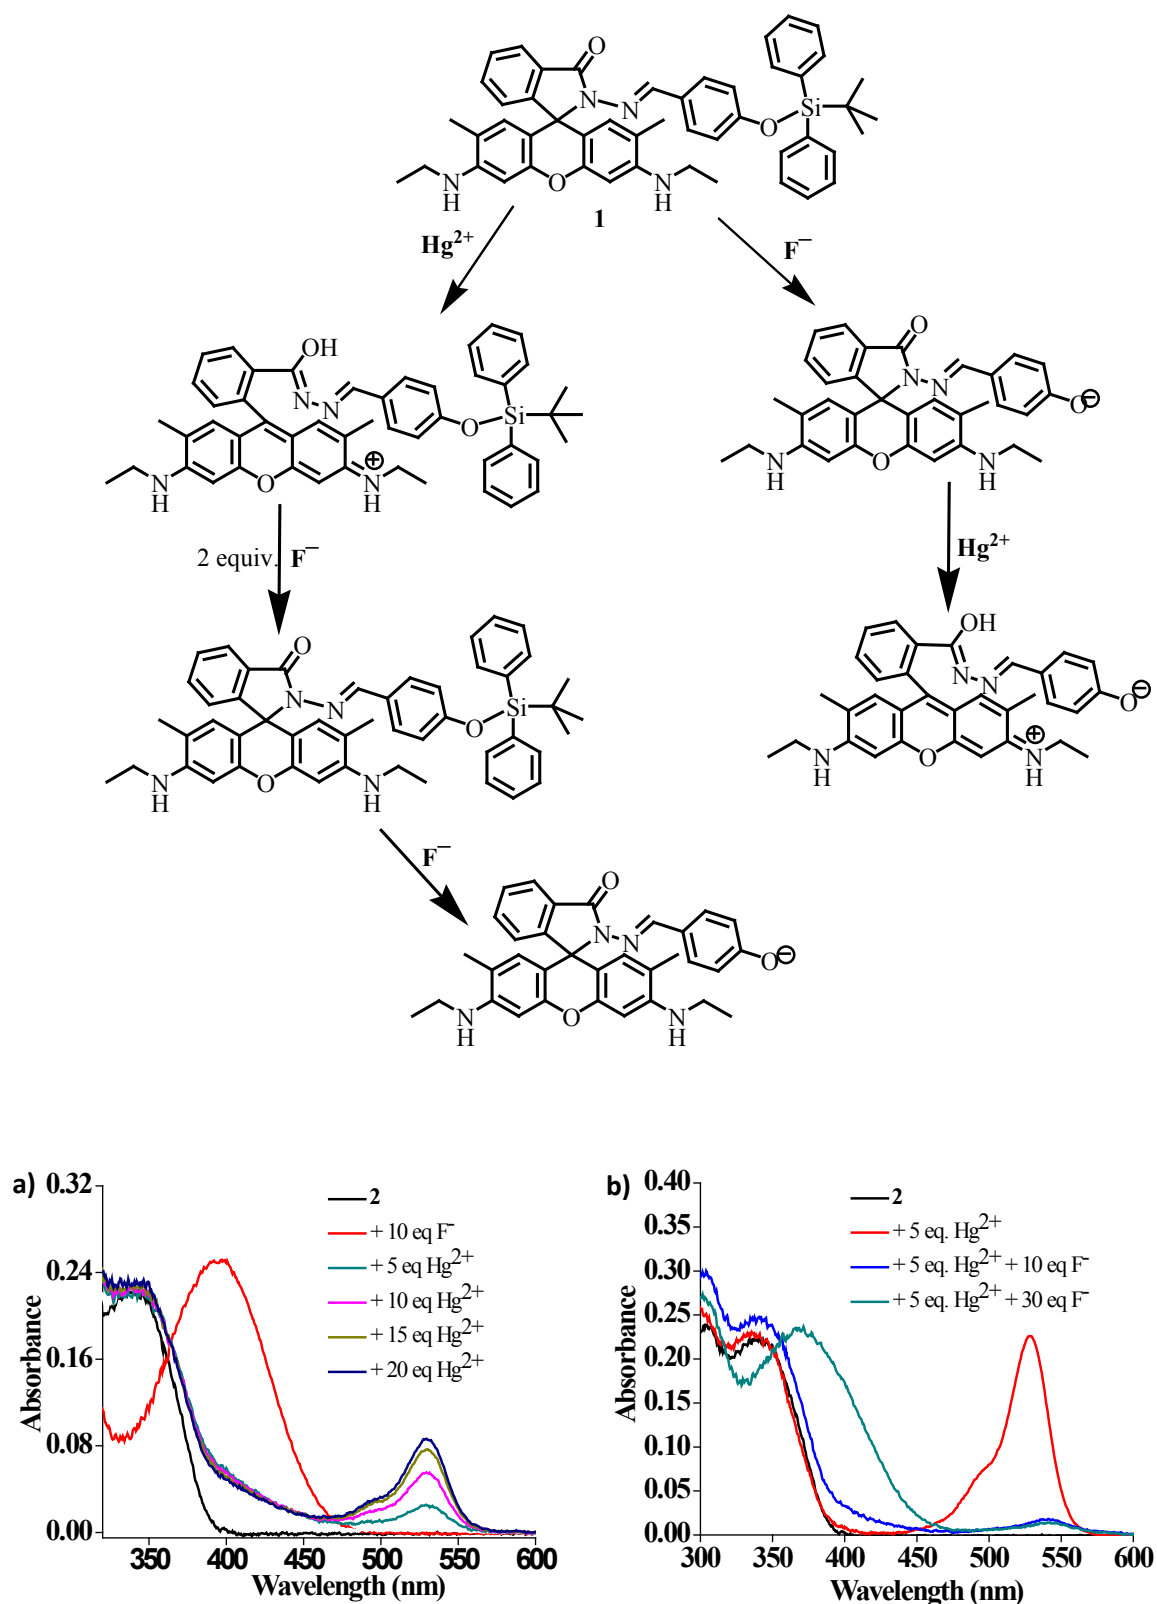

**Fig. S16** UV-vis spectra of (a) **2** (10  $\mu\text{M}$ ) in presence of  $\text{F}^-$  ions and to which titration was performed with progressive addition of  $\text{Hg}^{2+}$  ions. (b) **2** (10  $\mu\text{M}$ ) in presence of  $\text{Hg}^{2+}$  ions and to which titration was performed with progressive addition of  $\text{F}^-$  ions.

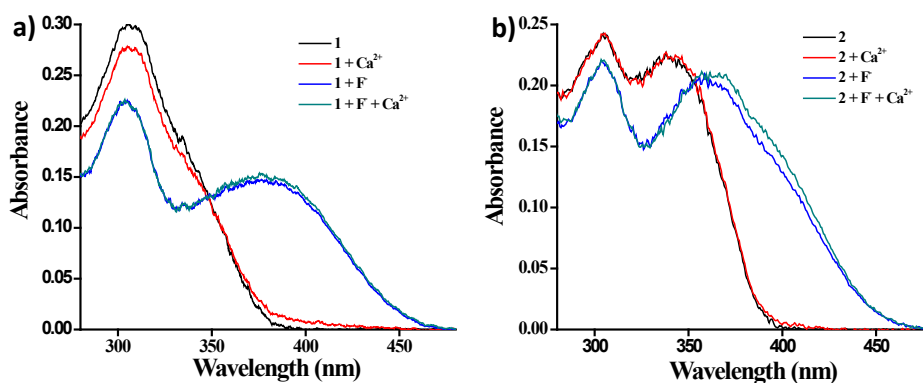

**Fig. S17** UV-vis spectra of (a) **1** (10 μM) and (b) **2** (10 μM) in acetonitrile upon addition of 5 equiv. of Ca<sup>2+</sup> ion after adding F<sup>-</sup> (10 equiv.).

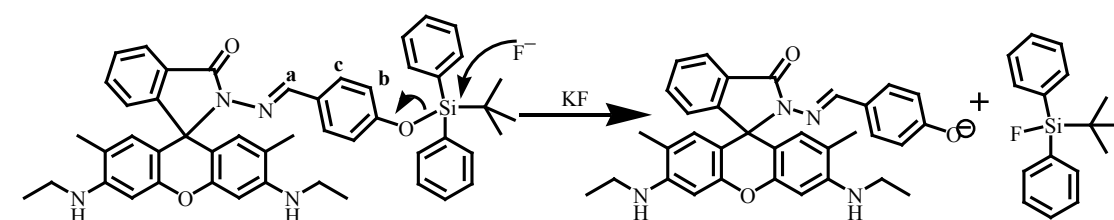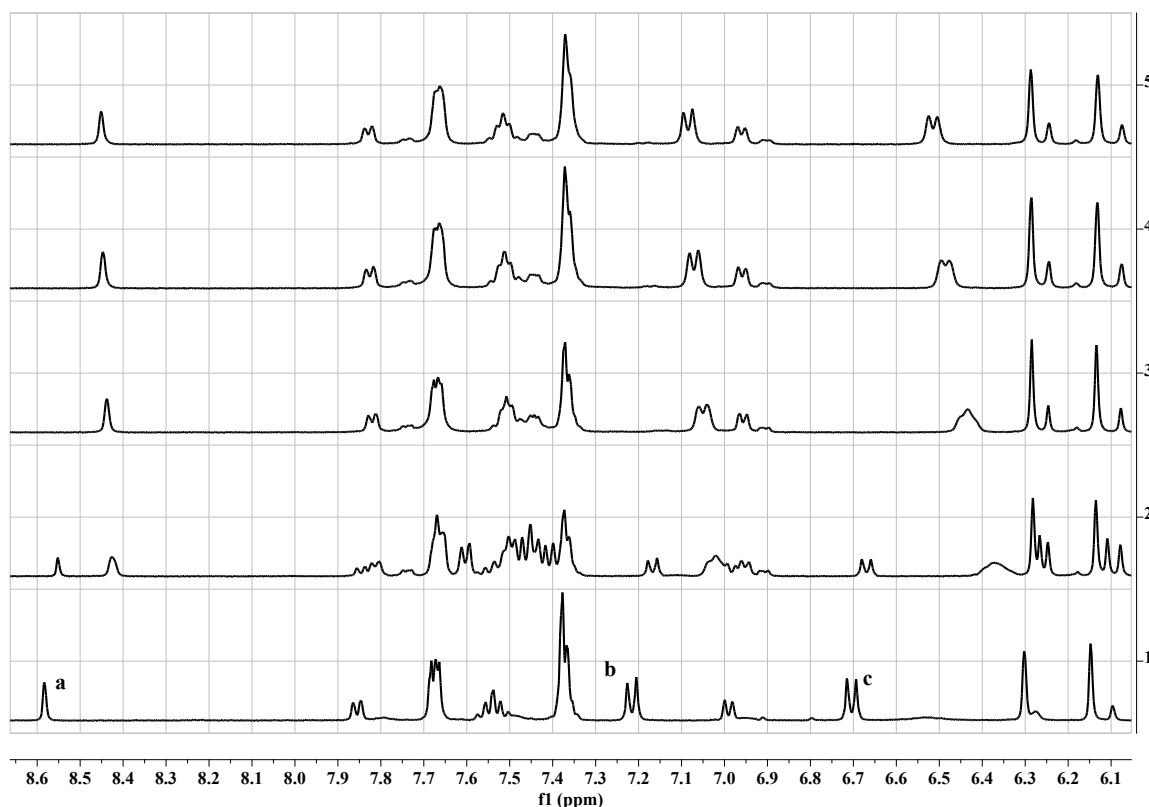

**Fig. S18** Partial <sup>1</sup>H NMR (400 MHz) spectra of **1** in DMSO-*d*<sub>6</sub> in the presence of [0, 0.25, 0.5, 0.75 and 1 equiv. (1-4)] of F<sup>-</sup> (KF in D<sub>2</sub>O).

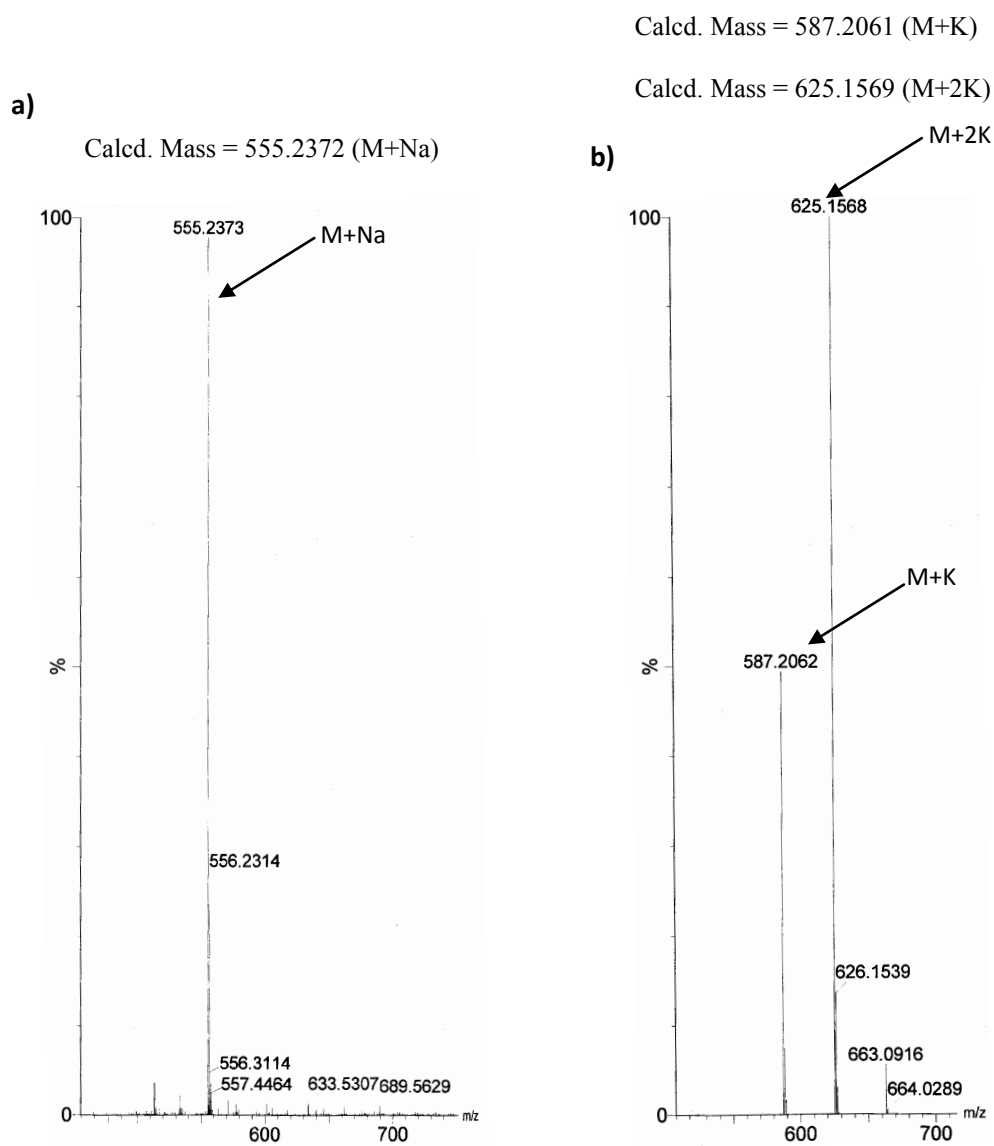

**Fig. S19** Mass spectra of (a) **1** and (b) **2** after addition of  $F^-$  ion.

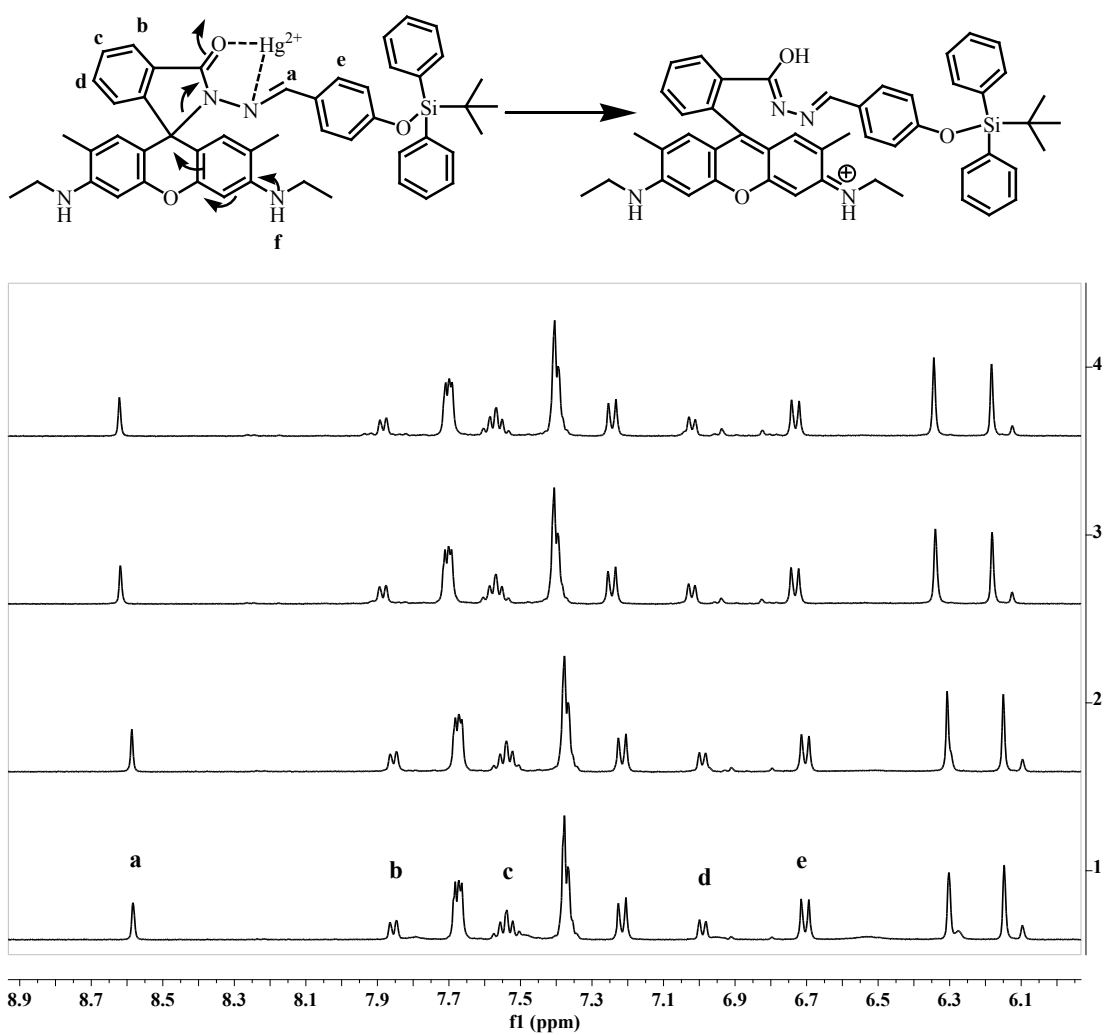

**Fig. 20** <sup>1</sup>H NMR titration of **1** (8 mM) with [0, 0.25 eq., 0.5 eq. 0.75 eq. and 1 eq. (1-5)] Hg<sup>2+</sup> (Hg(ClO<sub>4</sub>)<sub>2</sub>) in DMSO-*d*<sub>6</sub>.



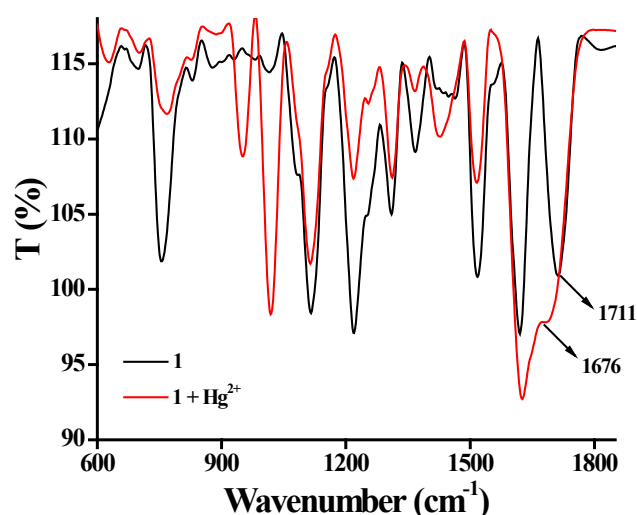

Fig. S21 IR spectra of 1 and 1-Hg<sup>2+</sup>.

**Protocol for the detection of Fluoride ion in toothpaste.** The toothpaste was weighed different amounts (4 samples; 3, 4, 5 and 6 mg) in small vials. The samples were dried overnight in oven (Temperature = 75 °C). Then to each sample 3 mL of water was added. After that the solutions were sonicated at 50 °C for 15 minute and equilibrated for 2 hours at room temperature. Then they were centrifuged and filtered to get clear solution. This solution was treated with the probe solution and the corresponding emission spectra were recorded in 8:2 CH<sub>3</sub>CN-Water mixture. In each case enhancement of emission of probe 2 at 535 nm was observed upon addition of toothpaste solution.

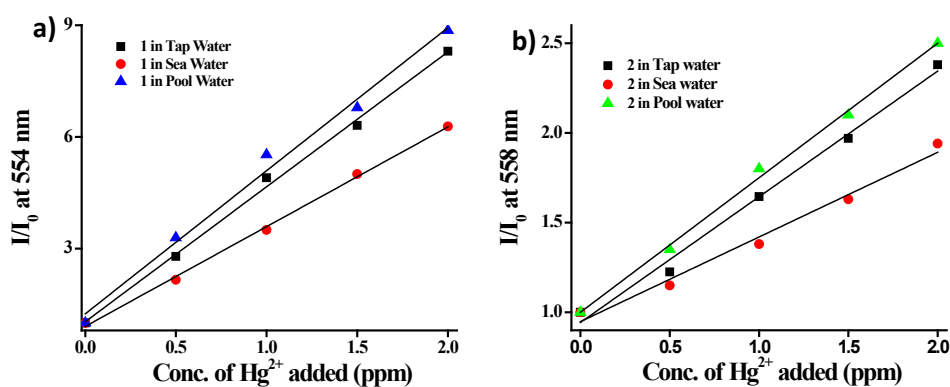

Fig. S22 Changes in the emission intensity ratio at 554 nm of (a) 1 (5 μM) ( $\lambda_{\text{ex.}} = 305 \text{ nm}$ ) and (b) 2 (5 μM) ( $\lambda_{\text{ex.}} = 305 \text{ nm}$ ) with the added Hg<sup>2+</sup> in tap water, sea water, and swimming pool water.

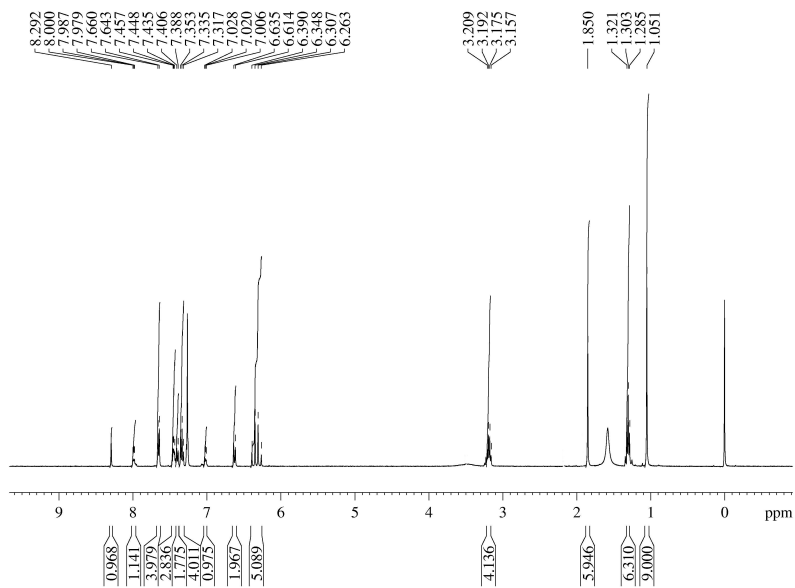

Fig. S23  $^1\text{H}$  NMR of compound 1.

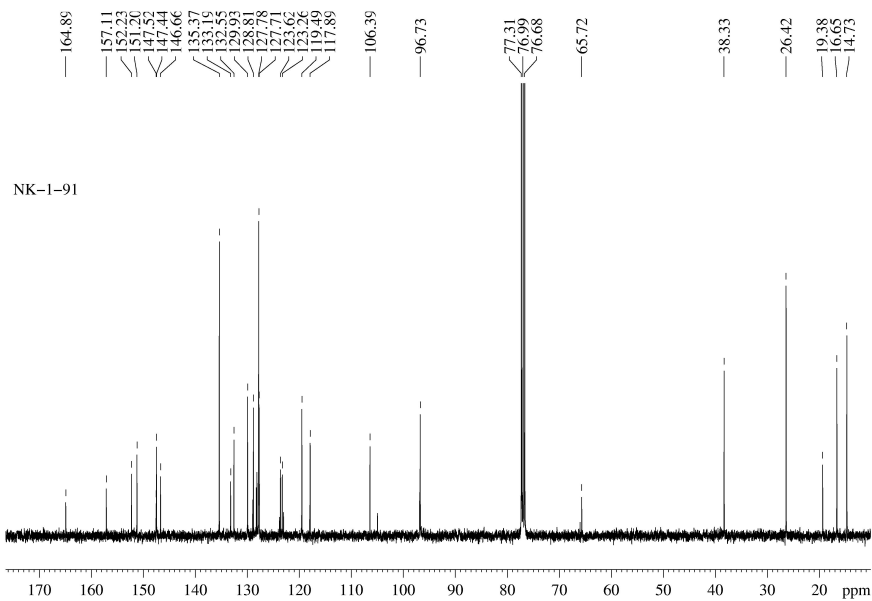

Fig. S24  $^{13}\text{C}$  NMR of compound 1.

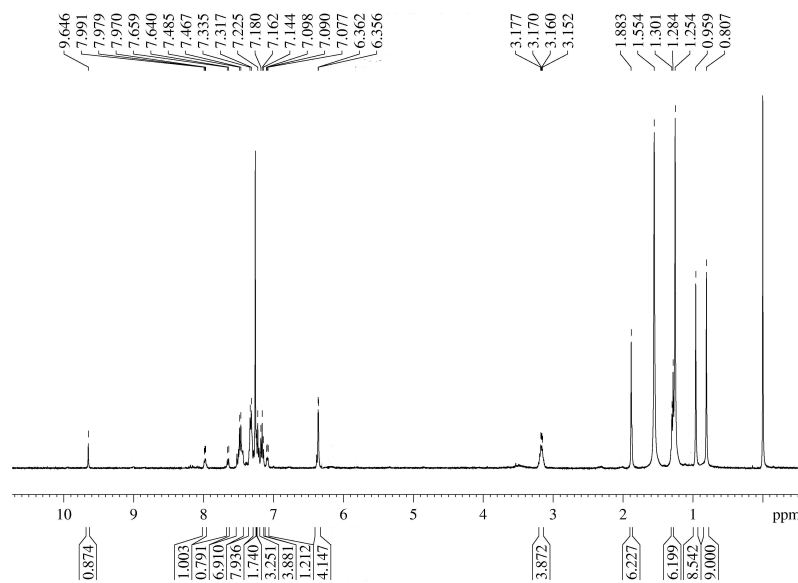

Fig. S25  $^1\text{H}$  NMR of compound **2**.

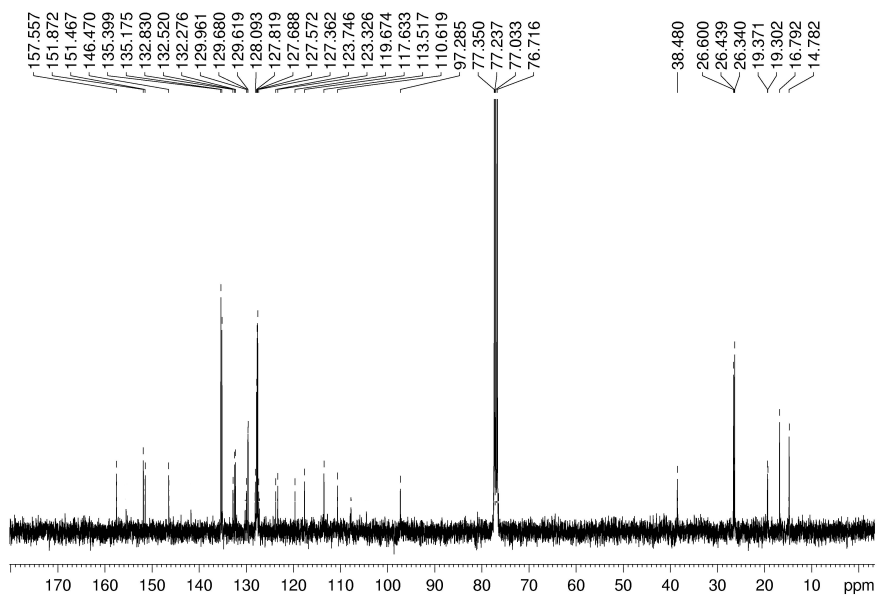

Fig. S26  $^{13}\text{C}$  NMR of compound **2**.
